# Supplementary material for: The first palladium(II) complexes containing arsino(phosphino)methanes as ligands †
Source: Royal Society of Chemistry journal article supplement (doi:10.1039/b001237h), 2000-01-01
Supplement: b001237h.doc [file b001237h.doc]

Supplementary Material

Preparative procedures, yields, melting points and elemental analyses for the compounds **3a,b**, **4a,b**, **5a,b**, **7** and **8**.

The preparation of **3a** is as follows: A solution of **1** (277 mg, 0.72 mmol) in CH2Cl2 (10 cm3) was added dropwise (over 5 min) to a solution of **2a** (235 mg, 0.73 mmol) in CH2Cl2 (5 cm3). After stirring for 1 h, the solution was filtered and the filtrate evaporated to dryness *in vacuo*. The oily residue was treated with pentane (20 cm3) and stirred for 30 min in an ultrasonic bath. A red-brown solid precipitated, which was filtered off, washed twice with pentane (5 cm3) and dried: yield 270 mg (75%); mp 188 °C (decomp.) (Found: C, 36.06; H, 6.61; Pd, 21.22. C15H34AsCl2PPd requires C, 36.20; H, 6.89; Pd, 21.38%). Compound **3b** was prepared analogously, from **1** (320 mg, 0.83 mmol) and **2b** (245 mg, 0.83 mmol) in CH2Cl2 (15 cm3). Red solid: yield 310 mg (83%); mp 232 °C (decomp.) (Found: C, 33.99; H, 6.25. C13H30AsCl2PPd requires C, 33.25; H, 6.44%).

The preparation of **4a** is as follows. A solution of **3a** (150 mg, 0.30 mmol) in CH2Cl2 (5 cm3) was treated at -40 °C with a solution of AgPF6 (76 mg, 0.30 mmol) in acetone (5 cm3). Under stirring, the reaction mixture was slowly brought to room temperature (1 h). After the solvent was removed *in vacuo*, the residue was suspended in CH2Cl2 (10 cm3) and the solution was filtered. The filtrate was evaporated to dryness *in vacuo*, the residue was washed twice with pentane (5 cm3) and dried. Light brown solid: yield 145 mg (80%); mp 159 °C (decomp.) (Found: C, 29.68; H, 5.40. C30H68As2Cl2F12P4Pd2 requires C, 29.67; H, 5.64%).  (MeNO2) 132.7 cm2W-1mol-1. Compound **4b** was prepared analogously, from **3b** (315 mg, 0.67 mmol) and AgPF6(169 mg, 0.67 mmol) in CH2Cl2-acetone(1:1, 16 cm3). Yellow solid: yield 268 mg (69%); mp 118 °C (decomp.) (Found: C 27.14; H 4.94. C26H60As2Cl2F12P4Pd2 requires C 26.96 H 5.22%).

The preparation of **5a** is as follows. A solution of **3a** (100 mg, 0.20 mmol) in CH2Cl2 (5 cm3) was treated at -30 °C with a solution of AgPF6 (100 mg, 0.40 mmol) in CH3CN (5 cm3). Under stirring, the reaction mixture was slowly warmed to room temperature (1 h). After the solvent was removed *in vacuo*, the residue was suspended in CH2Cl2 (8 cm3) and the solution was filtered. The filtrate was concentrated *in vacuo* (1.5 cm3). Upon dropwise addition of ether (15 cm3), a yellow, oily solid precipitated, which was separated from the mother liquor, washed three times with ether (8 cm3) and dried: yield 133 mg (83%); mp 98 °C (decomp.) (Found: C 28.48; H 4.75; N 3.42. C19H40AsF12N2P3Pd requires C 28.57; H 5.05 N 3.51%). (MeNO2) 157 cm2W-1mol-1.Compound **5b** was prepared analogously, from **3b** (100 mg, 0.22 mmol) and AgPF6(104 mg, 0.41 mmol) in CH2Cl2-CH3CN(1:1, 10 cm3). Yellow solid: yield 79 mg (47%); mp 64 °C (decomp.) (Found: C, 26.21; H, 4.48; N, 3.45. C17H36AsF12N2P3Pd requires C, 26.49; H, 4.71; N, 3.63%).

The preparation of **7** is as follows. A solution of **6** (130 mg, 0.49 mmol) in toluene (5 cm3) was treated with a solution of **2a** (185 mg, 0.58 mmol)in toluene (5 cm3). After stirring for 30 min, the solvent was removed *in vacuo*. The oily residue was treated with pentane (5 ml) and stirred for 20 min in an ultrasonic bath. A pale yellow solid precipitated, which was filtered off, washed twice with pentane (5 cm3) and dried: yield 194 mg (83%); mp 64 °C (decomp.) (Found: C, 40.56; H, 7.82; Pd, 23.25. C16H37AsClPPd requires C, 40.27; H, 7.81; Pd, 22.30%).

The preparation of **8** is as follows. A suspension of **7** (60 mg, 0.13 mmol) in ether (5 cm3) was treated with a solution of Na[B(ArF)4](106 mg, 0.12 mmol) in ether (6 cm3). After stirring for 1 h, a red solution and a white precipitate were formed. The reaction mixture was filtered, the filtrate was concentrated to ca. 5 cm3 *in vacuo* and stored at -78 °C for 72 h. A light red solid was obtained which was washed twice with pentane (5 cm3) and dried: yield 81 mg (69%); mp 70 °C (decomp.) (Found: C, 42.71; H, 4.53. C64H86As2BClF24P2Pd2 requires C, 43.13; H, 4.86%). MS (FAB): m/z 917 (M+ ).
